# Supplementary material for: PTBP1 depletion in mature astrocytes reveals distinct splicing alterations without neuronal features
Source: eLife. 2025 Nov 21;14:RP107683. doi: 10.7554/eLife.107683 (PMC12638047; doi:10.7554/eLife.107683)
Supplement: Figure 1—source data 1. [file elife-107683-fig1-data1.xlsx]

## Sheet: Sheet1
Figure 1-source data 1-Figure 1D
Figure 1D: Quantification of tdT+ astrocyte proportion at 4, 8, and 12 weeks following tamoxifen induction.
	% of tdT+ (in DAPI+)
Stages	Avg.		stdev		TTEST
	Control	KO	Control	KO
4w	7.26707	6.67987	1.15693	0.114147	0.215517
8w	6.13785	6.12782	1.6631	1.65858	0.497225
12w	6.21993	5.64403	1.17779	1.35491	0.304039
Source Data
	% of tdT+ (in DAPI+)
	Avg. % of multiple sections
Stages	Control 1	Control 2	Control 3	KO 1	KO 2	KO 3
4w	6.30787	6.94142	8.55193	6.552	6.7715	6.7161
8w	5.28094	5.07797	8.05466	5.4295	4.93259	8.02137
12w	6.00712	5.16305	7.48961	4.94798	4.77862	7.20549
	4W									8W									12W
	% of tdT+ (in DAPI+)									% of tdT+ (in DAPI+)									% of tdT+ (in DAPI+)
Section #	Control 1	Control 2	Control 3	KO 1	KO 2	KO 3			Section #	Control 1	Control 2	Control 3	KO 1	KO 2	KO 3			Section #	Control 1	Control 2	Control 3	KO 1	KO 2	KO 3
1	7.26601	9.76801	8.58835	9.68992	8.38471	8.0292			1	7.34745	5.62852	8.59301	4.70127	7.41902	7.72277			1	6.30722	5.50459	6.72547	5.92885	6.40608	6.67522
2	5.20629	6.6823	8.22086	6.57343	7.14286	6.90955			2	4.64241	3.78072	7.72201	7.79392	5.84416	8.20399			2	6.51921	5.837	7.78643	4.92891	5.14223	6.90955
3	7.23039	9.41043	8.82353	6.28743	7.0529	6.81576			3	4.81013	5.95948	8.77598	5.20607	5.16529	7.85124			3	5.23504	4.83221	6.40569	6.62932	3.85064	8.61314
4	6.40279	5.52486	7.2904	6.92042	7.09117	8.21727			4	5.30504	5.47945	7.77903	5.34759	5.72082	9.98573			4	6.29371	5.92593	5.47074	6.03889	5.17879	7.9614
5	8.12121	7.16113	9.63245	8.12121	6.69643	6.69856			5	4.47205	4.5657	8.03474	4.66321	5.51471	6.61269			5	8.29208	4.2654	9.71014	5.54348	4.35294	6.73653
6	6.21762	7.39348	6.07867	6.73575	8.27068	7.00483			6	4.66926	5.19068	7.96569	4.25764	3.77358	6.59631			6	4.77778	3.39181	7.54986	3.83838	5.54855	6.30872
7	7.48031	8.1864	8.07229	7.08661	7.93872	6.95364			7	4.88246	6.76692	8.05812	6.63176	4.20712	8.53835			7	5.86881	4.72637	7.20524	5.16772	4.27632	5.9034
8	6.81551	6.27962	8.38926	5.17039	7.27729	7.37798			8	6.66667	4.33387	8.59788	4.93066	4.36817	7.36677			8	6.64251	5.02717	9.32401	4.95868	4.39024	8.2
9	6.96864	6.42055	8.39895	6.44217	7.1525	7.37387			9	4.98489	4.65444	6.87898	5.33333	2.76753	9.94152			9	6.32111	5.06757	8.1203	4.81481	5.42495	7.38255
10	5.36332	7.68025	7.03448	6.16667	5.22959	6.59898			10	5.02901	4.41989	8.14111		4.54545	7.39437			10	5.26976	7.05244	6.59824	4.97175	3.21543	7.36434
11	7.38636	6.06061	8.76747	6.37982	6.98577	7.13376												11	6.8299			4.48792
12	6.34648	6.76884	8.10811	5.45746	5.83942	7.93434												12	5.75275			4.5977
13	7.45968	8.50662	9.67742	5.7732	6.18238	5.77281												13	6.74157			5.01355
14	5.91304	7.59013	9.09091	5.89226	6.78925	4.92611												14	6.04027			4.87062
15	4.63158	6.35246	10.5708	8.31409	6.33914	7.48175												15	7.07071			5.48341
16	5.47368	7.03422	7.28346	5.90631	5.68828	4.61538												16	6.68896			4.90463
17	5.05415	6.55172	8.85714	5.8209	9.82533	5.11628												17	4			4.24837
18	6.30798	7.13073	7.67045	4.95553	6.66667	6.88073												18	5.82524			4.3956
19	5.74324	5.33981	11.3333	6.298	6.34146	7.45098												19	4.99139			4.06386
20	4.769	5.72917	9.15033	7.04846	4.89796	5.03018												20	4.67446			4.07303
21		7.06714			7.3991
22		6.29371			7.67754
23		6.04575			4.50311
24		5.61622			5.14372
