# Supplementary material for: PTBP1 depletion in mature astrocytes reveals distinct splicing alterations without neuronal features
Source: eLife. 2025 Nov 21;14:RP107683. doi: 10.7554/eLife.107683 (PMC12638047; doi:10.7554/eLife.107683)
Supplement: Figure 1—source data 2. [file elife-107683-fig1-data2.xlsx]

## Sheet: Sheet1
Figure 1-source data 2-Figure 1E
Figure 1E: Quantification of Ptbp1 knockout efficiency in control and Ptbp1 cKO mouse cortex at 4, 8, and 12 weeks following tamoxifen induction.
	% of tdT+PTBP1+/tdT+
Stages	Avg.		stdev		TTEST
	Control	KO	Control	KO
4w	90.615	0.41858	5.72208	0.295791	5.37985e-06
8w	93.0373	0.123457	4.24367	0.213833	1.45115e-06
12w	92.5442	0.236582	3.92619	0.251078	1.09549e-06
Source Data
	% of tdT+PTBP1+/tdT+
	Avg. % of multiple sections
Stages	Control 1	Control 2	Control 3	KO 1	KO 2	KO 3
4w	95.3263	92.2711	84.2475	0.128205	0.719505	0.408029
8w	97.4449	92.6877	88.9792	0	0.37037	0
12w	95.9596	93.4185	88.2546	0.209746	0.5	0
	4W									8W									12W
	% of tdT+PTBP1+/tdT+									% of tdT+PTBP1+/tdT+									% of tdT+PTBP1+/tdT+
Section #	Control 1	Control 2	Control 3	KO 1	KO 2	KO 3			Section #	Control 1	Control 2	Control 3	KO 1	KO 2	KO 3			Section #	Control 1	Control 2	Control 3	KO 1	KO 2	KO 3
1	93.2203	93.75	88.5057	0	2.94118	0			1	100	91.6667	93.4066	0	0	0			1	83.871	93.75	83.6066	0	0	0
2	98.1132	78.9474	88.0597	0	2.22222	0			2	91.8919	87.5	91.25	0	0	0			2	92.8571	98.1132	87.1429	0	0	0
3	98.3051	93.9759	75.3086	0	1.78571	3.125			3	94.7368	96	89.4737	0	0	0			3	87.7551	97.2222	88.8889	0	0	0
4	96.3636	100	91.6667	0	4.08163	0			4	100	86.3636	92.7536	0	0	0			4	94.4444	89.5833	81.3953	1.69492	0	0
5	95.5224	91.0714	93.4211	0	2.22222	0			5	91.6667	95.122	91.8919	0	0	0			5	97.0149	97.2222	92.5373	0	0	0
6	100	96.6102	86.2745	0	1.51515	1.72414			6	100	93.8776	84.6154	0	0	0			6	95.3488	82.7586	90.566	0	0	0
7	92.9825	93.8462	85.0746	0	0	1.5873			7	100	94.4444	86.8852	0	0	0			7	98.0392	92.1053	90.9091	0	0	0
8	91.3793	98.1132	89.3333	0	0	0			8	100	96.2963	76.9231	0	0	0			8	100	91.8919	87.5	0	0	0
9	92.5	92.5	82.8125	0	0	0			9	100	93.9394	92.5926	0	0	0			9	98	96.6667	88.8889	0	0	0
10	93.5484	100	80.3922	0	0	0			10	96.1538	91.6667	90	0	3.7037	0			10	95.2381	94.8718	91.1111	0	5	0
11	97.4359	86.1111	85.5072	0	0	0												11	98.1132			0
12	89.1892	98.1132	87.3016	0	0	1.72414												12	100			2.5
13	89.1892	95.5556	83.3333	0	2.5	0												13	94.4444			0
14	100	92.5	84.4444	0	0	0												14	94.4444			0
15	90.9091	90.3226	78	0	0	0												15	100			0
16	100	83.7838	72.973	0	0	0												16	97.5			0
17	100	94.7368	67.7419	0	0	0												17	95.4545			0
18	100	92.8571	88.8889	2.5641	0	0												18	96.6667			0
19	94.1176	96.9697	90.1961	0	0	0												19	100			0
20	93.75	93.1818	85.7143	0	0	0												20	100			0
21		90			0
22		88.8889			0
23		83.7838			0
24		88.8889			0
