# Supplementary material for: PTBP1 depletion in mature astrocytes reveals distinct splicing alterations without neuronal features
Source: eLife. 2025 Nov 21;14:RP107683. doi: 10.7554/eLife.107683 (PMC12638047; doi:10.7554/eLife.107683)
Supplement: Figure 1—source data 3. [file elife-107683-fig1-data3.xlsx]

## Sheet: Sheet1
Figure 1-source data 3-Figure 1F
Figure 1F: Quantification of Ptbp1 knockout efficiency in control and Ptbp1 cKO mouse cortex at 4, 8, and 12 weeks following tamoxifen induction.
	% of tdT+PTBP1+/PTBP1+
Stages	Avg.		stdev		TTEST
	Control	KO	Control	KO
4w	36.5234	0.195078	3.14535	0.128719	1.84847e-05
8w	36.1322	0.0694444	8.00915	0.120281	0.000729476
12w	27.985	0.0551355	3.59617	0.0485969	8.83664e-05
Source Data
	% of tdT+PTBP1+/PTBP1+
	Avg. % of multiple sections
Stages	Control 1	Control 2	Control 3	KO 1	KO 2	KO 3
4w	40.1103	34.2362	35.2237	0.0909091	0.338979	0.155346
8w	33.443	29.8137	45.1399	0	0.208333	0
12w	26.0468	25.7737	32.1345	0.0736633	0.0917431	0
	4W									8W									12W
	% of tdT+PTBP1+/PTBP1+									% of tdT+PTBP1+/PTBP1+									% of tdT+PTBP1+/PTBP1+
Section #	Control 1	Control 2	Control 3	KO 1	KO 2	KO 3			Section #	Control 1	Control 2	Control 3	KO 1	KO 2	KO 3			Section #	Control 1	Control 2	Control 3	KO 1	KO 2	KO 3
1	40.4412	41.8994	65.2542	0	1.53846	0			1	44.0299	40.146	45.4545	0	0	0			1	21.3115	18.9076	28.9773	0	0	0
2	39.3939	40.9091	46.0938	0	0.833333	0			2	20.7317	22.293	36.1386	0	0	0			2	27.6596	24.2991	28.5047	0	0	0
3	44.6154	41.0526	40.3974	0	0.877193	1.25			3	27.4809	30.1887	45.9459	0	0	0			3	19.2825	18.617	37.2093	0	0	0
4	41.4062	26.738	38.1944	0	1.40845	0			4	27.3973	30.6452	50.7937	0	0	0			4	22.2707	23.3696	28.4553	0.653595	0	0
5	37.8698	30.1775	39.8876	0	1.17647	0			5	27.9661	37.5	47.2222	0	0	0			5	36.1111	18.9189	32.9787	0	0	0
6	37.5	50	30.137	0	0.714286	0.729927			6	24.6575	38.0165	36.4238	0	0	0			6	22.6519	25.8065	31.7881	0	0	0
7	32.1212	32.4468	30	0	0	0.555556			7	39.7059	31.4815	41.4062	0	0	0			7	26.455	27.7778	31.25	0	0	0
8	39.5522	37.6812	36.612	0	0	0			8	53.9683	22.807	49.505		0	0			8	29.5699	32.0755	44.8718	0	0	0
9	55.2239	29.1339	38.9706	0	0	0			9	38.3721	22.1429	41.6667	0	0	0			9	25.7895	23.3871	33.3333	0	0	0
10	36.7089	39.2	33.0645	0	0	0			10	30.1205	22.9167	56.8421	0	2.08333	0			10	23.8095	44.5783	23.9766	0	0.917431	0
11	39.1753	26.0504	37.5796	0	0	0												11	34.6667			0
12	39.759	32.9114	35.2564	0	0	0.571429												12	31.3333			0.819672
13	36.2637	45.7447	34.3511	0	1.5873	0												13	34			0
14	38.2022	35.5769	33.9286	0	0	0												14	27.2			0
15	25	43.75	30.4688	0	0	0												15	32.3077			0
16	33.7662	34.8315	23.2759	0	0	0												16	29.771			0
17	40	27.6923	23.3333	0	0	0												17	16.1538			0
18	53.9683	31.2	23.0769	1.81818	0	0												18	23.5772			0
19	47.7612	27.1186	33.8235	0	0	0												19	18.4713			0
20	43.4783	30.3704	30.7692	0	0	0												20	18.543			0
21		32.1429			0
22		30.4762			0
23		26.4957			0
24		28.0702			0
