# Supplementary material for: PTBP1 depletion in mature astrocytes reveals distinct splicing alterations without neuronal features
Source: eLife. 2025 Nov 21;14:RP107683. doi: 10.7554/eLife.107683 (PMC12638047; doi:10.7554/eLife.107683)
Supplement: Figure 1—source data 4. [file elife-107683-fig1-data4.xlsx]

## Sheet: Sheet1
Figure 1-source data 4-Figure 1G
Figure 1G: Quantification of PTBP1+NeuN+ double positive cells indicating PTBP1 is not expressed in neurons.
	% of PTBP1+NeuN+/NeuN
Stages	Avg.		stdev		TTEST
	Control	KO	Control	KO
4w	0.0629841	0.0353914
8w	0.0864938	0.0191763	0.0751627	0.0168224	0.102317
12w	0.0318595	0.0975652	0.0391031	0.107451	0.187965
Source Data
	% of PTBP1+NeuN+/NeuN
	Avg. % of multiple sections
Stages	Control 1	Control 2	Control 3	KO 1	KO 2	KO 3
4w	0.0629841			0.0353914
8w	0	0.13595	0.123531	0.0260824	0	0.0314465
12w	0.0754981	0.0200803	0	0.220624	0.0497503	0.0223214
	4W									8W									12W
	% of PTBP1+NeuN+/NeuN									% of PTBP1+NeuN+/NeuN									% of PTBP1+NeuN+/NeuN
Section #	Control 1	KO 1							Section #	Control 1	Control 2	Control 3	KO 1	KO 2	KO 3			Section #	Control 1	Control 2	Control 3	KO 1	KO 2	KO 3
1	0	0							1	0	0.488998	0	0	0	0			1	0	0	0	0.187266	0	0
2	0	0							2	0	0	0.248139	0	0	0			2	0	0	0	0.302115	0	0.223214
3	0	0							3	0	0	0	0	0	0			3	0	0	0	0.275482	0	0
4	0	0							4	0	0.498753	0	0	0	0			4	0	0	0	0.197239	0	0
5	0	0							5	0	0	0.255102	0	0	0			5	0.169492	0	0	0.379507	0	0
6	0	0							6	0	0	0	0	0	0			6	0	0	0	0	0	0
7	0.21978	0.212766							7	0	0.371747	0.291545	0	0	0.314465			7	0	0.200803	0	0.168634	0.236407	0
8	0.184502	0							8	0	0	0		0	0			8	0	0	0	0.15015	0	0
9	0	0							9	0	0	0.440529	0	0	0			9	0.196078	0	0	0.420168	0	0
10	0	0.268817							10	0	0	0	0.234742	0	0			10	0	0	0	0	0.261097	0
11	0.224215	0																11	0.206612			0.594059
12	0	0																12	0.18622			0
13	0.334448	0																13	0			0.226244
14	0	0.226244																14	0			0.255102
15	0.296736	0																15	0			0.257069
16	0	0																16	0.290698			0.512821
17	0	0																17	0			0
18	0	0																18	0.255102			0
19	0	0																19	0			0.486618
20	0	0																20	0.205761			0
21
22
23
24
