# Supplementary material for: PTBP1 depletion in mature astrocytes reveals distinct splicing alterations without neuronal features
Source: eLife. 2025 Nov 21;14:RP107683. doi: 10.7554/eLife.107683 (PMC12638047; doi:10.7554/eLife.107683)
Supplement: Figure 1—source data 5. [file elife-107683-fig1-data5.xlsx]

## Sheet: Sheet1
Figure 1-source data 5-Figure 1H
Figure 1H: Quantification of NeuN+tdT+ cells indicating absence of astrocyte to neuron conversion.
	% of tdT+NeuN+/tdT+
Stages	Avg.		stdev		TTEST
	Control	KO	Control	KO
4w	0.729078	0.48874	0.405996	0.304933	0.229175
8w	0.121311	0.0694444	0.106595	0.120281	0.302998
12w	0.933873	1.06599	0.412279	1.2253	0.434051
Source Data
	% of tdT+NeuN+/tdT+
	Avg. % of multiple sections
Stages	Control 1	Control 2	Control 3	KO 1	KO 2	KO 3
4w	1.01696	0.90557	0.264706	0.529262	0.771386	0.165572
8w	0	0.2	0.163934	0.208333	0	0
12w	0.755325	1.40533	0.640963	2.40467	0	0.793318
	4W									8W									12W
	% of tdT+NeuN+/tdT+									% of tdT+NeuN+/tdT+									% of tdT+NeuN+/tdT+
Section #	Control 1	Control 2	Control 3	KO 1	KO 2	KO 3			Section #	Control 1	Control 2	Control 3	KO 1	KO 2	KO 3			Section #	Control 1	Control 2	Control 3	KO 1	KO 2	KO 3
1	0	1.25	0	2	0	0			1	0	0	0	2.08333	0	0			1	0	0	0	3.33333	0	1.92308
2	0	1.75439	0	0	0	0			2	0	0	0	0	0	0			2	0	0	0	0	0	0
3	1.69492	0	0	2.38095	0	0			3	0	2	0	0	0	0			3	0	2.77778	0	4.22535	0	0
4	0	0	0	0	0	0			4	0	0	0	0	0	0			4	1.85185	0	0	1.69492	0	1.51515
5									5	0	0	0	0	0	0			5	0	0	1.49254	0	0	2.22222
6	0	0	0	1.49254	0	0			6	0	0	0	0	0	0			6	0	3.44828	1.88679	2.63158	0	0
7	1.66667	1.69492	1.96078	0	0	1.72414			7	0	0	1.63934	0	0	0			7	0	5.26316	3.0303	0	0	0
8	0	0	0	0	0	1.5873			8	0	0	0	0	0	0			8	0	0	0	1.85185	0	0
9	1.72414	0	1.33333	2.27273	0	0			9	0	0	0	0	0	0			9	2	0	0	0	0	2.27273
10									10	0	0	0	0	0	0			10	0	2.5641	0	2.27273	0	0
11	2.5	0	0	0	1.88679	0												11	0			5.12821
12	0	2.04082	0	0	0	0												12	2.12766			5
13	2.5641	0	0	0	3.7037	0												13	5.55556			5.40541
14	0	1.88679	0	0	2.08333	0												14	0			0
15																		15	0			2.63158
16	2.7027	2.22222	0	0	2.5	0												16	0			2.77778
17	2.94118	2.5	0	0	2.08333	0												17	0			7.69231
18	4.54545	3.22581	2	0	0	0												18	0			0
19	0	0	0	0	0	0												19	0			0
20																		20	3.57143			3.44828
21	0	0	0	0	0	0
22	0	2.38095	0	0	3.22581	0
23	0	0	0	2.43902	0	0
24	0	0	0	0	0	0
		0			3.0303
		0			0
		0			0
		2.77778			0
