# Supplementary material for: PTBP1 depletion in mature astrocytes reveals distinct splicing alterations without neuronal features
Source: eLife. 2025 Nov 21;14:RP107683. doi: 10.7554/eLife.107683 (PMC12638047; doi:10.7554/eLife.107683)
Supplement: Figure 1—source data 6. [file elife-107683-fig1-data6.xlsx]

## Sheet: Sheet1
Figure 1-source data 6-Figure 1I
Figure 1I: Quantification of NeuN+ cells at 4, 8, and 12 weeks following tamoxifen induction showing no changes in the proportion of neurons in control or Ptpb1 cKO cortex.
	% of NeuN+/DAPI
Stages	Avg.		stdev		TTEST
	Control	KO	Control	KO
4w	62.0753	60.3642	6.48663	7.39032	0.389062
8w	50.9549	58.3128	8.56172	1.99031	0.11035
12w	58.6636	59.2599	6.6626	1.33599	0.443272
Source Data
	% of NeuN+/DAPI
	Avg. % of multiple sections
Stages	Control 1	Control 2	Control 3	KO 1	KO 2	KO 3
4w	57.0046	69.3848	59.8366	54.4163	68.6376	58.0386
8w	57.3129	54.3322	41.2196	58.7577	60.043	56.1377
12w	66.3355	54.3312	55.324	59.5862	60.4025	57.791
	4W									8W									12W
	% of NeuN+/DAPI									% of NeuN+/DAPI									% of NeuN+/DAPI
Section #	Control 1	Control 2	Control 3	KO 1	KO 2	KO 3			Section #	Control 1	Control 2	Control 3	KO 1	KO 2	KO 3			Section #	Control 1	Control 2	Control 3	KO 1	KO 2	KO 3
1	50.6158	50.3053	46.693	64.9225	60.9125	43.3785			1	58.5305	51.7282	38.8996	52.8893	57.2623	53.6634			1	57.4771	56.9954	68.7982	52.7668	55.1574	67.3941
2	50.3929	64.9472	53.0061	65.1748	64.6032	49.6231			2	44.4166	49.9377	43.3025	62.0872	56.9573	55.3215			2	69.383	40.5286	70.1891	62.7488	54.5952	56.2814
3	57.4755	56.6893	49.3464	63.3234	59.8237	55.2716			3	60.9938	58.9087	42.5624	50.6508	61.0537	60.1928			3	51.2821	54.4966	44.9585	67.7871	60.21	76.4964
4	48.8941	62.4309	54.7995	69.8962	65.8466	54.039			4	57.3281	52.4364	37.6225	53.4759	59.0389	58.0599			4	61.8881	49.1358	53.944	51.8936	61.4057	62.0024
5	68.1212	68.6701	57.7947	51.1515	69.7917	41.866			5	61.4828	50.5639	45.3104	56.4767	62.1324	61.9433			5	73.0198	48.8152	43.4783	57.2826	75.2941	48.9521
6	59.4819	76.817	63.2896	63.8342	70.9273	47.2222			6	60	55.0562	39.6201	59.607	62.3899	54.8813			6	64.1111	50.6433	44.0171	63.4343	68.6003	44.4295
7	64.8294	64.3577	54.8193	58.6614	71.0306	51.8764			7	52.1148	61.6943		61.9546	61.4665	46.0203			7	62.9459	61.9403	64.4105	53.7625	69.5724	58.4973
8	62.9847	66.5877	60.6264	53.819	62.8607	60.84			8	63.6364			68.567		58.6207			8	76.2077	60.1902	63.6364	61.157	58.374	59
9	61.8467	80.2568	55.3806	46.1201	66.3968	45.4075			9				63.1111		61.7934			9	64.4753	57.0946	51.1278	58.7654	39.2405	51.1745
10	65.5709	75.7053	58.3448	54	56.25	47.2081			10						50.8803			10	63.6136	63.472	48.6804	66.5537	61.5756	53.6822
11	66.4773	77.4411	56.6709	50.2967	63.1307	56.5605												11	62.3711			58.1128
12	64.837	73.3078	60.103	51.8459	59.1241	62.5171												12	65.7283			69.8851
13	41.3306	84.6881	53.5842	42.268	61.6692	63.1285												13	61.985			59.8916
14	58.6087	84.8197	63.0303	56.734	52.1924	72.578												14	55.7047			59.6651
15	48.6316	65.7787	71.2474	53.3487	48.019	57.6642												15	64.6465			56.1328
16	78.1053	66.3498	64.1732	75.5601	58.4755	60.7692												16	57.5251			53.1335
17	40.7942	72.4138	70.8571	33.7313	86.0262	68.8372												17	73.2727			55.3922
18	36.9202	80.9847	67.8977	25.2859	86.2366	80.0459												18	76.1165			61.0675
19	54.5608	66.9903	66.2222	49.616	76.5854	65.8824												19	83.821			59.6517
20	59.6125	81.6406	68.8453	58.7372	100	76.0563												20	81.1352			62.6404
21		56.3604			79.3722
22		60.3147			75.8157
23		56.8627			71.2733
24		70.5148			80.938
