# Supplementary material for: PTBP1 depletion in mature astrocytes reveals distinct splicing alterations without neuronal features
Source: eLife. 2025 Nov 21;14:RP107683. doi: 10.7554/eLife.107683 (PMC12638047; doi:10.7554/eLife.107683)
Supplement: Figure 2—source data 1. [file elife-107683-fig2-data1.xlsx]

## Sheet: Sheet1
Figure 2-source data 1-Figure 2C
Figure 2C: Quantification of striatal tdT+ astrocyte proportion at 4, 8, and 12 weeks following tamoxifen induction.
	% of tdT+ (in DAPI+)
Stages	Avg.		stdev		TTEST
	Control	KO	Control	KO
4w	5.22629	5.35239	0.78732	0.418967	0.409293
8w	5.36667	4.43832	2.40235	0.569103	0.27519
12w	4.62096	4.32812	0.652625	0.0576392	0.241019
Source Data
	% of tdT+ (in DAPI+)
	Avg. % of multiple sections
Stages	Control 1	Control 2	Control 3	KO 1	KO 2	KO 3
4w	4.85885	4.68986	6.13016	5.39932	4.91194	5.74592
8w	4.65617	3.3997	8.04414	3.86856	4.43965	5.00676
12w	3.8721	5.06838	4.9224	4.39445	4.29971	4.2902
	4W									8W									12W
	% of tdT+ (in DAPI+)									% of tdT+ (in DAPI+)									% of tdT+ (in DAPI+)
Section #	Control 1	Control 2	Control 3	KO 1	KO 2	KO 3			Section #	Control 1	Control 2	Control 3	KO 1	KO 2	KO 3			Section #	Control 1	Control 2	Control 3	KO 1	KO 2	KO 3
1	4.88842	3.94867	7.30932	4.61216	5.4784	5.41082			1	3.63436	3.65034	9.48767	3.86385	3.60531	4.51923			1	3.62319	4.6789	4.96829	3.79638	3.86905	4.02116
2	6.43729	3.86521	5.78603	5.24434	4.40917	6.09756			2	5.62572	2.59857	8.88689	3.902	3.2381	5.16055			2	3.84995	3.87168	4.5738	4.81232	3.14402	4.65608
3	4.38675	6.00858	6.38554	6.15006	5.21472	4.55531			3	5.24515	3.70752	7.20251	4.01494	6.26655	4.91118			3	4.038	5.55556	4.58101	4.97354	4.40714	4.51977
4	3.72294	4.93697	6.05061	5.59072	4.54545	7.29517			4	4.11946	3.64238	6.25	3.69344	4.64865	6.05749			4	3.97727	6.1674	5.14706	3.99556	5.77865	3.28587
5			5.65806			5.54963			5			7.2711			4.1958			5			4.71567			4.50237
6			5.5914			5.56701			6			9.16667			5.1963			6			5.54855			4.75594
