# Supplementary material for: PTBP1 depletion in mature astrocytes reveals distinct splicing alterations without neuronal features
Source: eLife. 2025 Nov 21;14:RP107683. doi: 10.7554/eLife.107683 (PMC12638047; doi:10.7554/eLife.107683)
Supplement: Figure 2—source data 2. [file elife-107683-fig2-data2.xlsx]

## Sheet: Sheet1
Figure 2-source data 2-Figure 2D
Figure 2D: Quantification of Ptbp1 knockout efficiency in control and Ptbp1 cKO mouse striatum at 4, 8, and 12 weeks following tamoxifen induction.
	% of tdT+PTBP1+/tdT+
Stages	Avg.		stdev		TTEST
	Control	KO	Control	KO
4w	95.3362	0.340136	5.44635	0.589133	3.65915e-06
8w	92.9484	0.673324	6.01139	0.681169	6.1008e-06
12w	96.1169	0	2.77338	0	2.3063e-07
Source Data
	% of tdT+PTBP1+/tdT+
	Avg. % of multiple sections
Stages	Control 1	Control 2	Control 3	KO 1	KO 2	KO 3
4w	99.0588	97.8647	89.0852	0	1.02041	0
8w	97.8598	94.7405	86.2447	0	0.657895	1.36208
12w	97.2161	98.1722	92.9624	0	0	0
	4W									8W									12W
	% of tdT+PTBP1+/tdT+									% of tdT+PTBP1+/tdT+									% of tdT+PTBP1+/tdT+
Section #	Control 1	Control 2	Control 3	KO 1	KO 2	KO 3			Section #	Control 1	Control 2	Control 3	KO 1	KO 2	KO 3			Section #	Control 1	Control 2	Control 3	KO 1	KO 2	KO 3
1	100	97.5	92.7536	0	0	0			1	93.9394	100	86	0	2.63158	4.25532			1	94.2857	96.0784	95.7447	0	0	0
2	98.2759	100	77.3585	0	0	0			2	100	93.1034	85.8586	0	0	2.22222			2	97.4359	100	95.4545	0	0	0
3	97.9592	98.2143	98.1132	0	0	0			3	100	88.8889	86.9565	0	0	0			3	100	96.6102	95.122	0	0	0
4	100	95.7447	87.2727	0	4.08163	0			4	97.5	96.9697	92.9825	0	0	1.69492			4	97.1429	100	95.9184	0	0	0
5			84.7826			0			5			82.716			0			5			82.3529			0
6			94.2308			0			6			82.9545			0			6			93.1818			0
