# Supplementary material for: PTBP1 depletion in mature astrocytes reveals distinct splicing alterations without neuronal features
Source: eLife. 2025 Nov 21;14:RP107683. doi: 10.7554/eLife.107683 (PMC12638047; doi:10.7554/eLife.107683)
Supplement: Figure 2—source data 3. [file elife-107683-fig2-data3.xlsx]

## Sheet: Sheet1
Figure 2-source data 3-Figure 2E
Figure 2E: Quantification of Ptbp1 knockout efficiency in control and Ptbp1 cKO mouse striatum at 4, 8, and 12 weeks following tamoxifen induction.
	% of tdT+PTBP1+/PTBP1+
Stages	Avg.		stdev		TTEST
	Control	KO	Control	KO
4w	28.1647	0.143678	2.3556	0.248858	1.67545e-05
8w	32.7212	0.228763	12.3249	0.213652	0.00514764
12w	23.4452	0	5.70783	0	0.00103135
Source Data
	% of tdT+PTBP1+/PTBP1+
	Avg. % of multiple sections
Stages	Control 1	Control 2	Control 3	KO 1	KO 2	KO 3
4w	25.8189	28.1451	30.53	0	0.431034	0
8w	30.6754	21.5473	45.941	0	0.263158	0.423131
12w	19.5601	29.9985	20.777	0	0	0
	4W									8W									12W
	% of tdT+PTBP1+/PTBP1+									% of tdT+PTBP1+/PTBP1+									% of tdT+PTBP1+/PTBP1+
Section #	Control 1	Control 2	Control 3	KO 1	KO 2	KO 3			Section #	Control 1	Control 2	Control 3	KO 1	KO 2	KO 3			Section #	Control 1	Control 2	Control 3	KO 1	KO 2	KO 3
1	25	25.8278	35.7542	0	0	0			1	21.831	29.9213	53.0864	0	1.05263	1.23457			1	18.8571	28.1609	19.3966	0	0	0
2	36.7742	24.0741	28.8732	0	0	0			2	38.2812	15.9763	48.0226	0	0	0.719424			2	18.5366	26.5152	21.875	0	0	0
3	18.75	31.4286	24.8804	0	0	0			3	34.3284	20.7792	43.7956	0	0	0			3	18.4783	32.948	20.9677	0	0	0
4	22.7513	31.25	30.9677	0	1.72414	0			4	28.2609	19.5122	40.1515	0	0	0.584795			4	22.3684	32.3699	25.5435	0	0	0
5			28.6765			0			5			39.1813			0			5			15.3005			0
6			34.0278			0			6			51.4085			0			6			21.5789			0
