# Supplementary material for: PTBP1 depletion in mature astrocytes reveals distinct splicing alterations without neuronal features
Source: eLife. 2025 Nov 21;14:RP107683. doi: 10.7554/eLife.107683 (PMC12638047; doi:10.7554/eLife.107683)
Supplement: Figure 2—source data 4. [file elife-107683-fig2-data4.xlsx]

## Sheet: Sheet1
Figure 2-source data 4-Figure 2F
Figure 2F: Quantification of PTBP1+NeuN+ double positive cells indicating PTBP1 is not expressed in striatal neurons.
	% of PTBP1+NeuN+/NeuN
Stages	Avg.		stdev		TTEST
	Control	KO	Control	KO
4w	0	0
8w	0.012655	0.00968992	0.0219191	0.0193798	0.428393
12w	0.0619598	0.0415444	0.107318	0.0466945	0.388804
Source Data
	% of PTBP1+NeuN+/NeuN
	Avg. % of multiple sections
Stages	Control 1	Control 2	Control 3	KO 1	KO 2	KO 3
4w	0			0
8w	0	0	0.0379651	0.0387597	0	0
12w	0.185879	0	0	0.092081	0	0.0325521
	4W									8W									12W
	% of PTBP1+NeuN+/NeuN									% of PTBP1+NeuN+/NeuN									% of PTBP1+NeuN+/NeuN
Section #	Control 1	KO 1							Section #	Control 1	Control 2	Control 3	KO 1	KO 2	KO 3			Section #	Control 1	Control 2	Control 3	KO 1	KO 2	KO 3
1	0	0							1	0	0	0	0	0	0			1	0.373832	0	0	0	0	0
2	0	0							2	0	0	0	0.155039	0	0			2	0.184843	0	0	0.368324	0	0
3	0	0							3	0	0	0	0	0	0			3	0.184843	0	0	0	0	0.195312
4	0	0							4	0	0	0	0	0	0			4	0	0	0	0	0	0
5	0	0							5			0			0			5			0			0
6	0	0							6			0.22779			0			6			0			0
