# Supplementary material for: PTBP1 depletion in mature astrocytes reveals distinct splicing alterations without neuronal features
Source: eLife. 2025 Nov 21;14:RP107683. doi: 10.7554/eLife.107683 (PMC12638047; doi:10.7554/eLife.107683)
Supplement: Figure 2—source data 5. [file elife-107683-fig2-data5.xlsx]

## Sheet: Sheet1
Figure 2-source data 5-Figure 2G
Figure 2G: Quantification of NeuN+tdT+ cells indicating absence of astrocyte to neuron conversion in the striatum.
	% of tdT+NeuN+/tdT+
Stages	Avg.		stdev		TTEST
	Control	KO	Control	KO
4w	0.468146	0	0.0922896	0	0.000462763
8w	0.0631313	0.219298	0.109347	0.379836	0.265679
12w	0.540729	0.189394	0.664148	0.32804	0.228749
Source Data
	% of tdT+NeuN+/tdT+
	Avg. % of multiple sections
Stages	Control 1	Control 2	Control 3	KO 1	KO 2	KO 3
4w	0.510204	0.531915	0.362319	0	0	0
8w	0	0	0.189394	0	0.657895	0
12w	1.28205	0	0.340136	0.568182	0	0
	4W									8W									12W
	% of tdT+NeuN+/tdT+									% of tdT+NeuN+/tdT+									% of tdT+NeuN+/tdT+
Section #	Control 1	Control 2	Control 3	KO 1	KO 2	KO 3			Section #	Control 1	Control 2	Control 3	KO 1	KO 2	KO 3			Section #	Control 1	Control 2	Control 3	KO 1	KO 2	KO 3
1	0	0	0	0	0	0			1	0	0	0	0	2.63158	0			1	0	0	0	2.27273	0	0
2	0	0	0	0	0	0			2	0	0	0	0	0	0			2	5.12821	0	0	0	0	0
3	2.04082	0	0	0	0	0			3	0	0	0	0	0	0			3	0	0	0	0	0	0
4	0	2.12766	0	0	0	0			4	0	0	0	0	0	0			4	0	0	2.04082	0	0	0
5			2.17391			0			5			0			0			5			0			0
6			0			0			6			1.13636			0			6			0			0
