# Supplementary material for: PTBP1 depletion in mature astrocytes reveals distinct splicing alterations without neuronal features
Source: eLife. 2025 Nov 21;14:RP107683. doi: 10.7554/eLife.107683 (PMC12638047; doi:10.7554/eLife.107683)
Supplement: Figure 2—source data 6. [file elife-107683-fig2-data6.xlsx]

## Sheet: Sheet1
Figure 2-source data 6-Figure 2H
Figure 2H: Quantification of NeuN+ cells at 4, 8, and 12 weeks following tamoxifen induction showing minimal changes in the proportion of neurons in control or Ptbp1 cKO striatum.
	% of NeuN+/DAPI
Stages	Avg.		stdev		TTEST
	Control	KO	Control	KO
4w	57.0662	56.9453	2.18388	4.25993	0.483614
8w	52.6603	63.3972	5.14646	1.13143	0.0313366
12w	61.0413	59.4929	9.52803	5.62033	0.410181
Source Data
	% of NeuN+/DAPI
	Avg. % of multiple sections
Stages	Control 1	Control 2	Control 3	KO 1	KO 2	KO 3
4w	55.8312	55.7796	59.5877	52.183	58.2601	60.3929
8w	57.4496	53.3123	47.2189	62.5602	64.6844	62.9469
12w	58.7147	71.5171	52.892	55.1583	65.8431	57.4773
	4W									8W									12W
	% of NeuN+/DAPI									% of NeuN+/DAPI									% of NeuN+/DAPI
Section #	Control 1	Control 2	Control 3	KO 1	KO 2	KO 3			Section #	Control 1	Control 2	Control 3	KO 1	KO 2	KO 3			Section #	Control 1	Control 2	Control 3	KO 1	KO 2	KO 3
1	62.4867	59.7236	60.3814	45.3878	64.3519	63.1263			1	57.0485	53.7634	45.6357	66.7893	64.8956	75.3846			1	55.383	62.5688	46.723	48.0587	64.6825	60
2	53.7181	41.1298	58.8428	52.5626	56.9665	62.7033			2	55.4535	50.8754	47.1816	58.5299	63.8095	69.2661			2	53.4057	88.7168	52.2869	52.2618	69.8783	60.9524
3	61.1459	64.8069	62.0482	57.9336	57.362	62.5813			3	59.5211	55.298	50.3289	65.8263	64.519	59.4566			3	64.2518	63.7476	53.1844	63.5979	69.3599	57.8531
4	45.974	57.458	59.736	52.8481	54.3599	57.9125			4	57.7755		45.7292	59.0951	65.5135	60.2669			4	61.8182	71.0352	53.3613	56.7148	59.4515	44.7974
5			55.2276			62.2199			5						65.5012			5			53.5368			58.0569
6			61.2903			53.8144			6						47.806			6			58.2598			63.204
